# Supplementary material
Source: PubMed Central journal article supplement (PMC4121789)
Supplement: 1405072111_pnas.201405072SI.pdf [file 1405072111_pnas.201405072SI.pdf]

# Supporting Information

McCullough et al. 10.1073/pnas.1405072111

**Table S1. Types and frequencies of transgressions**

| Transgression type                                                                                            | Count | %    |
|---------------------------------------------------------------------------------------------------------------|-------|------|
| Betrayals of confidence or insults by a friend                                                                | 59    | 17.5 |
| Neglect by a romantic partner, spouse, or ex-romantic partner                                                 | 17    | 5.0  |
| Infidelity by a romantic partner or spouse                                                                    | 94    | 27.9 |
| Rejection, neglect, or insult by a family member                                                              | 33    | 9.8  |
| Termination of a romantic relationship                                                                        | 34    | 10.1 |
| Insults by people other than family or friends                                                                | 14    | 4.2  |
| Rejection or abandonment by a friend or prospective relationship partner                                      | 32    | 9.5  |
| Other (e.g., sexual harassment from a boss, date rape by a friend, invasion of privacy by a romantic partner) | 54    | 16.0 |
| Total                                                                                                         | 337   | 100  |

**Table S2. Descriptive statistics and correlations among variables**

| Variable               | Range      | Mean | SD   | 1       | 2       | 3       | 4       | 5      | 6      | 7      | 8     | 9 |
|------------------------|------------|------|------|---------|---------|---------|---------|--------|--------|--------|-------|---|
| 1: CG <sub>T1</sub>    | 1.00–4.82  | 2.13 | 0.95 |         |         |         |         |        |        |        |       |   |
| 2: CG <sub>T2</sub>    | 1.00–4.85  | 2.34 | 1.02 | 0.77**  |         |         |         |        |        |        |       |   |
| 3: RV <sub>T1</sub>    | 0.00–10.00 | 3.76 | 2.90 | 0.54**  | 0.52**  |         |         |        |        |        |       |   |
| 4: RV <sub>T2</sub>    | 0.00–10.00 | 4.48 | 3.01 | 0.46**  | 0.63**  | 0.76**  |         |        |        |        |       |   |
| 5: ER <sub>T1</sub>    | 1.00–7.00  | 3.53 | 1.65 | –0.62** | –0.57** | –0.63** | –0.55** |        |        |        |       |   |
| 6: ER <sub>T2</sub>    | 1.00–7.00  | 3.47 | 1.72 | –0.45** | –0.65** | –0.57** | –0.75** | 0.62** |        |        |       |   |
| 7: Self-reported anger | 1.00–5.00  | 1.74 | 0.84 | 0.06    | –0.01   | –0.06   | –0.17** | 0.07   | 0.24** |        |       |   |
| 8: Anger words         | –0.70–6.45 | 0.00 | 0.93 | 0.10    | 0.04    | –0.10   | –0.16*  | –0.04  | 0.06   | 0.24** |       |   |
| 9: Facial anger        | 0.06–4.97  | 1.28 | 0.98 | –0.12   | –0.08   | –0.10   | –0.12   | 0.11   | 0.10   | 0.14   | 0.16* |   |

CG, conciliatory gestures; ER, exploitation risk; RV, relationship value. T1 and T2 refer to time 1 and time 2, respectively. \* $P < 0.05$ ; \*\* $P < 0.01$ .

**Table S3. Baseline growth model of TRIM forgiveness**

| Parameter                 | Estimate | SE    | <i>P</i> |
|---------------------------|----------|-------|----------|
| <b>Means</b>              |          |       |          |
| Intercept                 | 55.91    | 1.03  | <0.001   |
| Forgive                   | -0.32    | 0.04  | <0.001   |
| <b>Variances</b>          |          |       |          |
| Intercept                 | 198.94   | 25.23 | <0.001   |
| Forgive                   | 0.24     | 0.04  | <0.001   |
| <b>Residual variances</b> |          |       |          |
| Day 8                     | 48.15    | 11.02 | <0.001   |
| Day 10                    | 40.06    | 7.01  | <0.001   |
| Day 12                    | 35.85    | 5.89  | <0.001   |
| Day 14                    | 35.58    | 4.76  | <0.001   |
| Day 16                    | 27.33    | 4.06  | <0.001   |
| Day 18                    | 23.47    | 3.63  | <0.001   |
| Day 20                    | 29.49    | 3.89  | <0.001   |
| Day 22                    | 28.48    | 3.78  | <0.001   |
| Day 24                    | 21.75    | 3.92  | <0.001   |
| Day 26                    | 15.90    | 4.34  | <0.001   |
| Day 28                    | 18.56    | 5.23  | <0.001   |
| <b>Covariances</b>        |          |       |          |
| Forgive, intercept        | -2.03    | 0.84  | 0.015    |
| Day 8, day 10             | 21.50    | 6.60  | 0.001    |
| Day 10, day 12            | 17.67    | 4.76  | <0.001   |
| Day 12, day 14            | 13.01    | 3.48  | <0.001   |
| Day 14, day 16            | 13.83    | 3.26  | <0.001   |
| Day 16, day 18            | 1.84     | 2.34  | 0.430    |
| Day 18, day 20            | 11.36    | 2.92  | <0.001   |
| Day 20, day 22            | 11.39    | 2.80  | <0.001   |
| Day 22, day 24            | 11.42    | 2.92  | <0.001   |
| Day 24, day 26            | 5.40     | 2.67  | 0.043    |
| Day 26, day 28            | 4.69     | 3.72  | 0.207    |

Coefficients are unstandardized. Days refer to number of days since the transgression occurred.
