# Supplementary material
Source: PubMed Central journal article supplement (PMC4121789)
Supplement: 1405072111_pnas.1405072111.sapp.pdf [file 1405072111_pnas.1405072111.sapp.pdf]

## SI Appendix

### Questions asked during the anger interview

1. Take a moment to remember the specific event and then describe exactly what happened in as much detail as you can, without using any names.
2. How long ago did this happen?
3. What feelings do you remember during this event?
4. If you had to choose one emotion that best describes how you felt after this event happened to you, would it be "hurt," or "angry"? Or would it be some other feeling? Can you explain why?
5. Did you express your feelings to the other person in any way?
6. Why do you suppose they did this to you?
7. What was your relationship like with this person before this event?
8. What is it like now?
9. What would it take to be completely reconciled or for the situation to be completely resolved?
10. Can you describe for me the kinds of emotions you are feeling right now as a result of having spent these few moments talking about what happened to you?
11. From your perspective, what was the worst aspect about what they did to you?
12. Now, suppose (the person who hurt the participant) were here and I asked them to describe this event, in their own words. What would their description be like? What do you think of their view?
